# Supplementary material
Source: PubMed Central journal article supplement (PMC3631661)
Supplement: 1219982110_pnas.201219982SI.pdf [file 1219982110_pnas.201219982SI.pdf]

# Supporting Information

Nan et al. 10.1073/pnas.1219982110

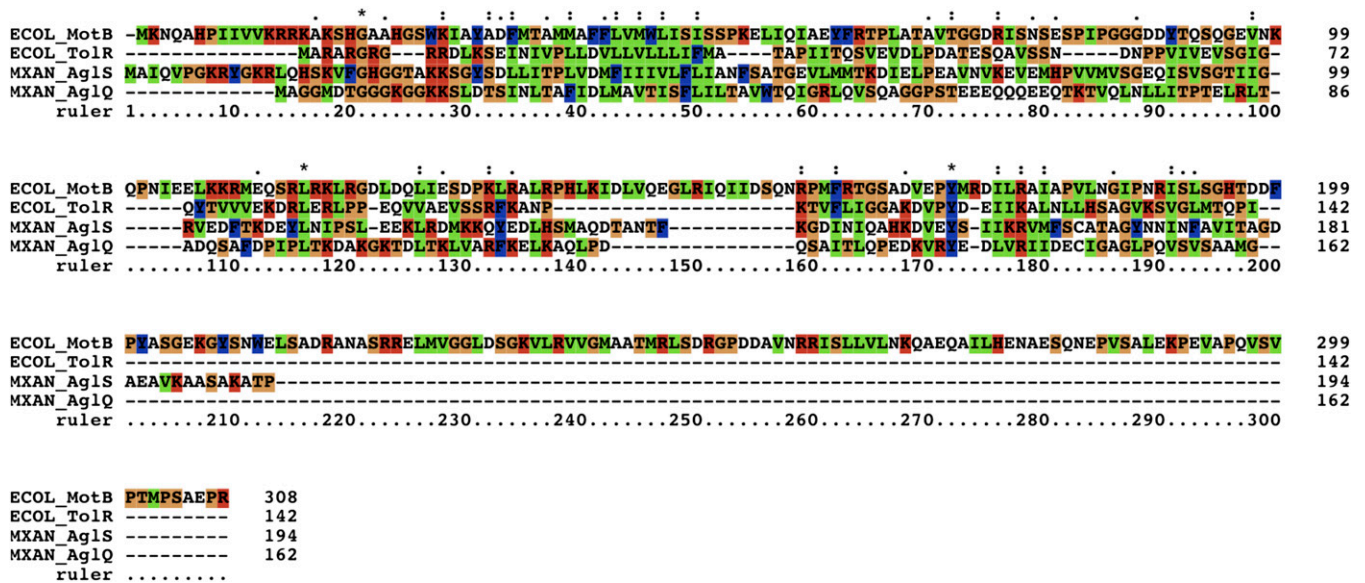

Fig. S1. Sequence alignment of *Myxococcus xanthus* MotB homologs AglS and AglQ with *Escherichia coli* MotB and TolR. Both AglS and AglQ lack the C-terminal peptidoglycan attachment motif of MotB, making the motor complexes free to move in the membrane.

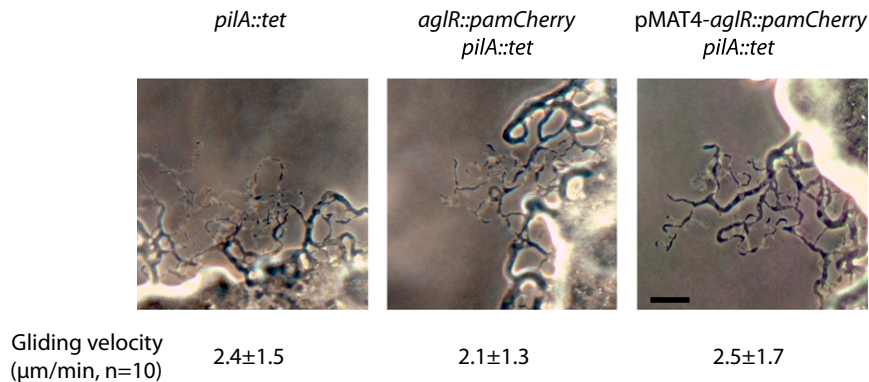

Fig. S2. Expressing AglR-pamCherry as the sole (Center) or an extra (Right) source of AglR does not cause any defect in gliding motility comparing to the wild type (left). *M. xanthus* cells were grown on casitone yeast extract (CYE) plates containing 1.5% (wt/vol) agar. To solely display gliding motility, the type IV pili powered twitching motility was eliminated by an insertion into the *pilA* gene, which encodes pilin, the building block of pilus. (Scale bar, 100  $\mu\text{m}$ .)





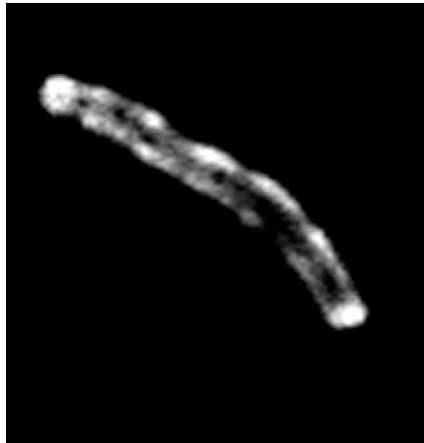

**Movie S5.** AgIR-decorated macrostructure rotated as cells moved on 1.5% (wt/vol) agar surface. Images of a *agIR::pamCherry pilA::tet* cell were captured at 2-s intervals on the Olympus DeltaVision microscope with a Rhodamine filter. The movie was obtained by processing the series of images collected with QuickTime Pro software and played with the speed of six frames per second ( $12 \times$  real time).

[Movie S5](#)

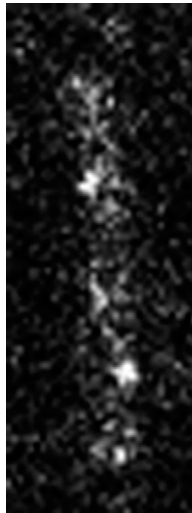

**Movie S6.** The typical behavior of AgIR-pamCherry molecules observed by photoactivatable localization microscopy (PALM; Fig. 3A). Two molecules were imaged at 200-ms intervals in two different cells, and the movie was played with the speed of 10 frames per second ( $2 \times$  real time). The trajectories of AgIR molecules are typically projected into zigzag traces in 3D, suggesting a 3D rotational motion along helical trajectories.

[Movie S6](#)

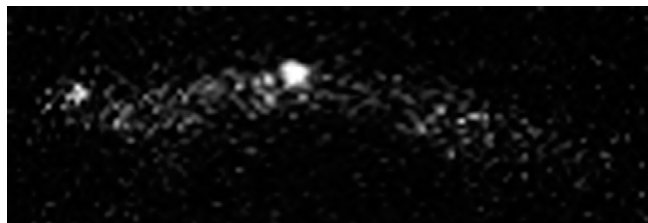

**Movie S7.** The typical behavior of AgIR-pamCherry molecules observed by PALM (Fig. 3A). Two molecules were imaged at 200-ms intervals in two different cells, and the movie was played with the speed of 10 frames per second ( $2 \times$  real time). The trajectories of AgIR molecules are typically projected into zigzag traces in 3D, suggesting a 3D rotational motion along helical trajectories.

[Movie S7](#)

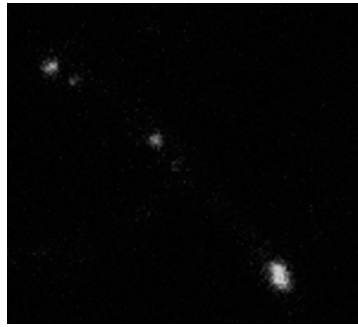

**Movie S8.** MXAN\_6483, another *E. coli* MotA homolog in *M. xanthus*, does not show any rotational motion, indicating that the observed movement of AgIR is a specific motility-related behavior. The MXAN\_6483 molecule was imaged at 100-ms intervals, and the movie was played with the speed of 10 frames per second (real time).

[Movie S8](#)

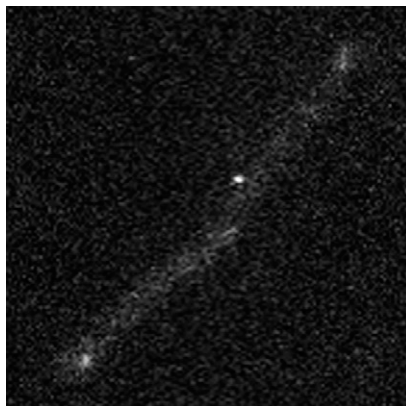

**Movie S9.** The typical behavior of AgIR-pamCherry molecules observed by PALM, combined with total internal reflection fluorescence microscopy (Fig. 3B). Two molecules were imaged at 100-ms intervals in two different cells, and the movie was played with the speed of 10 frames per second (real time). In the movie, only half (180°) of the cylindrical cell surfaces were imaged, which allows fast imaging with high signal-to-noise ratio. Due to geometrical projection, AgIR-pamCherry molecules usually display maximum  $V_{2D}$  at the centers of the projected cell surfaces and minimum  $V_{2D}$  at the cell borders.

[Movie S9](#)

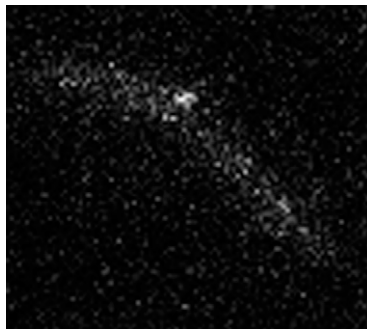

**Movie S10.** The typical behavior of AgIR-pamCherry molecules observed by PALM, combined with TIRFM (Fig. 3B). Two molecules were imaged at 100-ms intervals in two different cells, and the movie was played with the speed of 10 frames per second (real time). In the movie, only half (180°) of the cylindrical cell surfaces were imaged, which allows fast imaging with high signal-to-noise ratio. Due to geometrical projection, AgIR-pamCherry molecules usually display maximum  $V_{2D}$  at the centers of the projected cell surfaces and minimum  $V_{2D}$  at the cell borders.

[Movie S10](#)



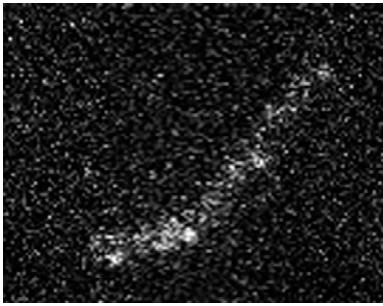

**Movie S14.** The abnormal behavior of AgIR in the *agmU* deletion mutant (Fig. 7 A–C). AgIR molecules move with much lower velocity, and many molecules were observed moving in linear trajectories with frequent pauses and reversals. The AgIR molecule was imaged at 100-ms intervals, and the movie was played with the speed of 10 frames per second (real time).

[Movie S14](#)

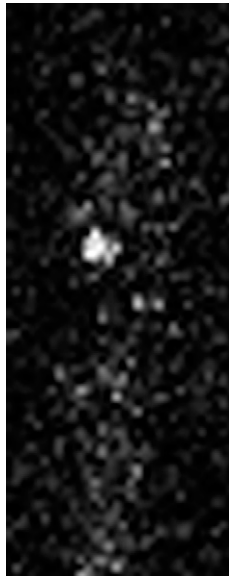

**Movie S15.** The abnormal behavior of AgIR in the *agIZ* deletion mutant (Fig. 7 D–F). AgIR molecules move actively, with the maximum  $V_{2D}$  even faster than in the WT. However, AgIR molecule movement seems to be undirected and slows down at random positions. The AgIR molecule was imaged at 100-ms intervals, and the movie was played with the speed of 10 frames per second (real time).

[Movie S15](#)
